1  
2  
3  
4  
5  
6  
7  
8  
9  
10  
11  
12  
13  
14  
15  
16  
17  
18  
19  
20  
21  
22  
23

Full Title: Crosstalk between guanosine nucleotides  
regulates cellular heterogeneity in protein synthesis during  
nutrient limitation

Short title: Crosstalk between guanosine nucleotides regulates  
heterogeneity

Simon Diez, Molly Hydorn, Abigail Whalen and Jonathan Dworkin\*

Department of Microbiology and Immunology, College of Physicians and Surgeons, Columbia  
University, New York, NY 10032

\*Corresponding author

Email: [jonathan.dworkin@columbia.edu](mailto:jonathan.dworkin@columbia.edu)

## Author Contributions

Conceived and designed the experiments: SD and JD. Performed the experiments and analyzed  
the data: SD, MH, and AW. Supervised the study: JD. Wrote the paper: SD and JD.

## 24 **Abstract**

25 Phenotypic heterogeneity of microbial populations can facilitate survival in dynamic environments  
26 by generating sub-populations of cells that may have differential fitness in a future environment.  
27 *Bacillus subtilis* cultures experiencing nutrient limitation contain distinct sub-populations of cells  
28 exhibiting either comparatively high or low protein synthesis activity. This heterogeneity requires  
29 the production of phosphorylated guanosine nucleotides (pp)ppGpp by three synthases: SasA,  
30 SasB, and RelA. Here we show that these enzymes differentially affect this bimodality: RelA and  
31 SasB are necessary to generate the sub-population of cells exhibiting low protein synthesis  
32 whereas SasA is necessary to generate cells exhibiting comparatively higher protein synthesis.  
33 The RelA product (pppGpp) allosterically activates SasB and we find, in contrast, that the SasA  
34 product (pGpp) competitively inhibits this activation. Finally, we provide *in vivo* evidence that this  
35 antagonistic interaction mediates the observed heterogeneity in protein synthesis. This work  
36 therefore identifies the mechanism underlying phenotypic heterogeneity in the central  
37 physiological process of protein synthesis.

## 38 **Author Summary**

39 Upon encountering conditions that are unfavorable to growth, such as nutrient limitation, bacteria  
40 enter into a quiescent phenotype that is mediated by group of guanosine nucleotides collectively  
41 known as (pp)pGpp. These nucleotides direct the down-regulation of energy intensive processes  
42 and are essential for a striking heterogeneity in protein synthesis observed during exit from rapid  
43 growth. Here, we show that a network of (pp)pGpp synthases is responsible for this heterogeneity  
44 and describe a mechanism that allows for the integration of multiple signals into the decision to  
45 down regulate the most energy intensive process in a cell.

46

## 47 Introduction

48 Nutrient availability is a major environmental cue for bacteria. For example, amino acid starvation  
49 results in induction of the stringent response, a conserved mechanism dependent on the  
50 synthesis of the nucleotides guanosine penta- and tetra-phosphate ((p)ppGpp). These  
51 nucleotides mediate a broad shut down of energy intensive reactions which are required during  
52 rapid growth (1, 2). (p)ppGpp directly binds and inhibits key proteins that catalyze processes  
53 including transcription (RNA polymerase (3, 4)), translation (GTPase IF2 (5)), GTP biosynthesis  
54 (HprT and GmK (6)), DNA replication (DNA primase (7)), and ribosome assembly (ObgE and  
55 RsgA (8)).

56 Gram-positive bacteria typically encode a single, bi-functional RSH enzyme capable of  
57 both (p)ppGpp synthesis and hydrolysis as well as two additional small alarmone synthases (SAS)  
58 that lack hydrolytic activity. Unlike RSH proteins, which are activated by the binding of deacylated  
59 tRNAs to the A-site of the ribosome, SAS enzymes are believed to be transcriptionally regulated  
60 (9) and some are also under allosteric control (10). RelA/SpoT and the SAS synthases  
61 preferentially produce different molecules in different species. For example, in response to amino  
62 acid starvation, *E. coli* RelA produces approximately equal amounts of the tetra-phosphorylated  
63 (ppGpp) and the penta-phosphorylated (pppGpp) guanosines, whereas *B. subtilis* RelA primarily  
64 generates pppGpp using GTP and ATP as substrates (11). *B. subtilis* SasB preferentially utilizes  
65 GDP and ATP to generate the tetra-phosphorylated guanosine (ppGpp) (12) and SasA, the other  
66 SAS enzyme in *B. subtilis*, primarily generates a 5' monophosphate 3' di-phosphate guanosine  
67 (pGpp) using GMP and ATP as substrates *in vivo* (12). Together, these three closely related  
68 nucleotides are referred to as (pp)pGpp.

69 Recently, our laboratory demonstrated that accumulation of (pp)pGpp attenuates protein  
70 synthesis when populations of *B. subtilis* cease growing exponentially (5). This attenuation is  
71 bimodal and results in a heterogeneity in the protein synthesis activity of individual cells that

72 exhibit either comparatively high or low protein synthesis activity (5). Here we find that a network  
73 of interacting (pp)pGpp synthases including a RSH protein (RelA) and two SAS proteins (SasA,  
74 SasB) underlies this heterogeneity since the absence of any of these synthases results in the loss  
75 of bimodality. The products of SasA and RelA, pGpp and pppGpp respectively, together  
76 antagonistically regulate activation of the third synthase (SasB), that is itself responsible for the  
77 synthesis of ppGpp, which inhibits Initiation Factor 2 and thereby attenuates protein synthesis (5).  
78

## 79 Results

### 80 The SasA and SasB (pp)pGpp synthases contribute to 81 heterogeneity

82 Cellular heterogeneity in protein synthesis as *B. subtilis* cultures exit rapid growth is dependent  
83 on the presence of the phosphorylated guanosine nucleotides (pp)pGpp (5). We investigated the  
84 origins of this heterogeneity by assessing single cell protein synthesis using O-propargyl-  
85 puromycin (OPP) incorporation in strains carrying deletion mutations in either of the two *B. subtilis*  
86 (pp)pGpp synthases (SasA and SasB) whose expression increases during exit from rapid growth  
87 (12). To quantify these effects we applied a cutoff that specifies the population of cells with low  
88 rates of protein synthesis. We set the threshold of this cutoff (850 relative fluorescence units  
89 (RFU)) as the magnitude of OPP labeling of wildtype *B. subtilis* culture in late transition phase  
90 (Fig. S1A) that captures 95% of the entire population. We used this threshold to define the fraction  
91 of the population with low rates of protein synthesis (“OFF”) (Fig. S1B). By convention, we define  
92 the remainder of the population as “ON.”

93 A strain lacking SasB ( $\Delta sasB$ ) contained fewer “OFF” cells as compared to the wildtype  
94 strain (Fig. 1A, B; S2). This result is consistent with our previous observation that the SasB  
95 product ppGpp inhibits the function of IF2 and thereby downregulates protein synthesis (5). In  
96 contrast, a strain lacking SasA ( $\Delta sasA$ ) does not contain the substantial fraction of “ON” cells  
97 seen in the wildtype parent strain (Fig. 1A, C; S2) and most cells in the population are “OFF”. This  
98 observation suggests that the SasA product pGpp does not directly inhibit translation, as does  
99 ppGpp, but rather acts indirectly.

100 **Fig 1. *sasB* and *sasA* have opposing effects on bimodality. (A, B, C)** Representative  
101 pictures and population distributions of OPP labeled **(A)** wildtype (JDB1772), **(B)**  $\Delta sasB$   
102 (JDB4310) and **(C)**  $\Delta sasA$  (JDB4311) during late transition phase.

103

## 104 ***sasA* but not *sasB* expression is correlated with levels of** 105 **protein synthesis**

106 *sasA* and *sasB* are regulated transcriptionally and expressed post-exponentially (12, 13) when  
107 the heterogeneity is observed (Fig 1A). We therefore asked if expression of either *sasA* or *sasB*  
108 is correlated with protein synthesis using transcriptional fusions of the *sasA* or the *sasB* promoters  
109 to YFP ( $P_{sasA}$ -*yfp* or  $P_{sasB}$ -*yfp*). Consistent with prior observations (12), expression of both *sasA*  
110 and *sasB* reporters increased during the exit from exponential growth (Fig 2A, B). We examined  
111 the relationship between promoter activity and protein synthesis by measuring both YFP  
112 expression and OPP incorporation in single cells. Cells with higher *sasA* expression ( $P_{sasA}$ -*yfp*)  
113 are more likely to have higher levels of protein synthesis than cells with lower *sasA* expression  
114 (Fig 2D). If the population is divided into quartiles of *sasA* expression, average OPP incorporation  
115 in the top two quartiles as compared to the bottom quartile is significantly higher (Fig 2D). In  
116 comparison, there was no significant difference in OPP incorporation between any of the quartiles  
117 of *sasB* expression (Fig 2C). Thus, differences in *sasA*, but not *sasB*, expression are associated  
118 with the observed heterogeneity in protein synthesis.

119 **Fig 2. Relationship between *sasA* or *sasB* expression and OPP incorporation. (A, B)**  
120 Representative population distribution of *B. subtilis* carrying a transcriptional reporter of (A)  $P_{sasB}$ -  
121 *yfp* (JDB4341) or (B)  $P_{sasA}$ -*yfp* (JDB4030) during exponential and late transition phase. (C, D)  
122 Average OPP incorporation of each quartile of (C)  $P_{sasB}$ -*yfp* expression or (D)  $P_{sasA}$ -*yfp* expression  
123 from lowest to highest. Statistical analysis (one tailed t-test) showed no significant difference in  
124 OPP incorporation between any  $P_{sasB}$ -YFP quartiles ( $p > 0.05$ ) and significantly higher OPP  
125 incorporation between quartiles 1 and 3 and quartiles 1 and 4 of  $P_{sasA}$ -*yfp* expression ( $p$ -values  
126 0.027 and 0.016, respectively).

127

## 128 **SasB allosteric activation is necessary for heterogeneity**

129 If changes in *sasB* transcription are not associated with differences in protein synthesis (Fig 2C),  
130 but SasB is necessary for the heterogeneity of protein synthesis (Fig 1B), what mechanism  
131 underlies differential SasB activity in single cells? *B. subtilis* SasB is subject to allosteric activation  
132 by pppGpp, the main product of *B. subtilis* RelA (14). Phe-42 is a key residue in this activation  
133 and a SasB mutant protein carrying an F42A substitution (SasB<sup>F42</sup>) is not allosterically activated  
134 by pppGpp *in vitro* (14). We investigated the importance of this allosteric activation for protein  
135 synthesis heterogeneity using a strain expressing SasB<sup>F42</sup>. Heterogeneity of this strain is  
136 significantly attenuated compared to the WT strain, demonstrating the importance of the allosteric  
137 activation of SasB by pppGpp for the bimodality of protein synthesis activity (Fig 3A, B; S3 Fig).

138 **Fig 3. Allosteric activation of SasB is required for bimodality during exit from rapid growth.**  
139 **(A, B,C)** Representative picture and population distribution of OPP labeled **(A)** wildtype  
140 (JDB1772), **(B)** *sasB*<sup>F42A</sup> (JDB4340), and **(C)** *relA*<sup>Y308A</sup> (JDB4300) strains during late transition  
141 phase.

142  
143 This result suggests that the enzyme responsible for pppGpp synthesis could also affect the  
144 heterogeneity. RelA is the primary source of pppGpp in *B. subtilis* (11), so the loss of *relA* would  
145 be predicted to affect SasB activity. We therefore generated a strain expressing a RelA mutant  
146 protein (RelA<sup>Y308A</sup>) carrying a single amino acid change at a conserved residue essential for  
147 synthase but not hydrolysis activity (15, 16) since RelA hydrolytic activity is essential in a strain  
148 that retains functional *sasA* and *sasB* genes (17). Labeling of this strain with OPP in late transition  
149 phase revealed that the “OFF” population was largely absent (Fig 3C; S3), demonstrating that  
150 RelA-mediated pppGpp synthesis is important for the bimodality.

151

## 152 **SasB allosteric activation is inhibited by pGpp**

153 A strain lacking SasA ( $\Delta$ sasA) contains more “OFF” cells as compared to the wildtype parent (Fig  
154 1C). The presence of this sub-population of cells depends on a SasB protein that can be  
155 allosterically activated (Fig 3B). Integrating these two observations, we hypothesized that the  
156 product of SasA (pGpp) inhibits the allosteric activation of SasB by pppGpp. The similarity of  
157 pGpp and pppGpp suggests that they could have an antagonistic interaction since they are likely  
158 capable of binding to the same site on SasB, but their differing phosphorylation states could affect  
159 their ability to allosterically activate SasB.

160 We tested this model by assaying *in vitro* whether pGpp inhibits the allosteric activation of  
161 SasB. First, we confirmed that SasB generates more ppGpp when reactions are supplemented  
162 with pppGpp (14) and observed a ~2 fold increase in ppGpp production when SasB was incubated  
163 with pppGpp (Fig 4A). Using pGpp synthesized *in vitro* by the recently identified (p)ppGpp  
164 hydrolase NahA (18), we observed that pGpp attenuates the allosteric activation of SasB in a  
165 dose dependent manner (Fig 4A). Since even the highest concentration of pGpp did not decrease  
166 production of ppGpp relative to that generated by SasB without the addition of pppGpp (Fig 4A),  
167 the inhibition is likely specific to the allosteric activation. We first tested this directly by assaying  
168 the effect of pGpp on SasB activity in the absence of its allosteric activator (pppGpp). Addition of  
169 pGpp did not significantly affect SasB activity within the range of pGpp concentrations we used  
170 previously (Fig S4). We further confirmed the specificity by assaying a SasB<sup>F42</sup> mutant protein  
171 that is insensitive to allosteric activation by pppGpp (14). As previously reported SasB<sup>F42A</sup> has  
172 similar activity to a non-allosterically activated WT SasB in the presence of pppGpp (Fig 4B).  
173 However, in contrast with wildtype SasB, pGpp does not affect the activity of SasB<sup>F42A</sup> even when  
174 pppGpp is included (Fig 4B).

175 **Fig 4. The product of SasA (pGpp) inhibits the allosteric activation of SasB by pppGpp.**

176 **(A)** Representative TLC of nucleotides present following incubation of wildtype SasB with [ $\alpha$ -<sup>32</sup>P]-  
177 ATP and GDP in the presence or absence of pppGpp and increasing concentrations of pGpp  
178 (top). Quantitation of the ratio of ppGpp to total nucleotides present in each lane in TLC. Ratio of



179 ppGpp was calculated using the formula:  $\text{ppGpp}/\text{ATP} + \text{ppGpp}$  (bottom) **(B)** Representative TLC  
180 of nucleotides present following incubation of SasB<sup>F42A</sup> with [ $\alpha$ -<sup>32</sup>P]-ATP and GDP in the presence  
181 or absence of pppGpp and increasing concentrations of pGpp (top). Ratio of ppGpp present in  
182 each lane in TLC as determined the formula,  $\text{ppGpp}/\text{ATP} + \text{ppGpp}$  (bottom). Statistical analysis  
183 (two tailed t-test) showed no significance ( $p > 0.05$ ) between reactions containing SasB in the  
184 presence or absence of pppGpp and/or pGpp.

185

186 These *in vitro* biochemical experiments suggest that the effect of SasA on protein synthesis  
187 heterogeneity is dependent on the activity of SasB. If this is true *in vivo*, then the phenotype of a  
188  $\Delta\text{sasA}$  mutation should be epistatic to that of a  $\Delta\text{sasB}$  mutation. Consistently, the population of  
189 "OFF" cells in a  $\Delta\text{sasA}$  strain is absent in a strain lacking both SasA and SasB ( $\Delta\text{sasA} \Delta\text{sasB}$ )  
190 (Fig 5A, B; S5). Thus, the effect of SasA is dependent *in vivo* on SasB. Finally, since RelA  
191 activates SasB, a  $\Delta\text{sasA}$  mutation should be epistatic to a *relA* mutation with respect to protein  
192 synthesis. A strain expressing RelA<sup>Y308A</sup> and carrying a  $\Delta\text{sasA}$  mutation exhibits a loss of  
193 heterogeneity similar to the *relA*<sup>Y308A</sup> strain, demonstrating that the effect of the  $\Delta\text{sasA}$  mutation  
194 depends on a functional RelA synthase (Fig 5A, C; S5). This result is consistent with the  
195 hypothesis that *sasA* is epistatic to *relA*.

196 **Fig 5. *sasA* is epistatic to *sasB* and *relA*.** **(A, B, C)** Representative pictures and population  
197 distributions of OPP labeled **(A)**  $\Delta\text{sasA}$  (JDB4310), **(B)**  $\Delta\text{sasA} \Delta\text{sasB}$  (JDB4312) **(C)**  $\Delta\text{sasA}$   
198 *relA*<sup>Y308A</sup> (JDB 4301) strains during late transition phase.

199

200 While SasA is the only known (pp)pGpp synthase that predominately produces pGpp *in*  
201 *vivo* in *B. subtilis* (12), pGpp also accumulates in stationary phase cells as a result of degradation  
202 of both ppGpp and pppGpp by the (p)ppGpp hydrolase NahA (18, 19). We therefore asked if  
203 NahA contributes to the heterogeneity in protein synthesis by comparing OPP incorporation in

204 wildtype and  $\Delta nahA$  cells during late transition phase. We observed no difference in heterogeneity  
205 (Fig S6) consistent with SasA being the primary source of pGpp .

206

## 207 **Discussion**

208 *B. subtilis* populations experiencing nutrient limitation and entering into quiescence respond  
209 bimodally with respect to global protein synthesis activity (5). Here, we find that this bimodality  
210 depends on all three (pp)pGpp synthases. We demonstrate that it is dependent on the allosteric  
211 activation of SasB by the RelA product pppGpp and that this activation is antagonized by the  
212 SasA product pGpp (Fig 6A). Our work therefore provides a mechanism for the phenotypic  
213 heterogeneity observed and identifies novel regulatory interactions between (pp)pGpp synthases.

214 **Fig 6. Generation of heterogeneity in protein synthesis. (A)** In response to amino acid  
215 limitation, RelA synthesizes pppGpp that allosterically activates SasB. This activation is inhibited  
216 by pGpp, the product of SasA and the crosstalk of these two nucleotides determines how much  
217 ppGpp SasB produces. **(B)** In cells with relatively higher *sasA* ('A') expression, increased  
218 inhibition of SasB ('B') allosteric activation by RelA ('R') results in relatively high protein synthesis.  
219 In cells with relatively lower *sasA* expression, decreased inhibition of SasB allosteric activation  
220 attenuates protein synthesis to a greater extent than in cells with lower *sasA* expression.

221

## 222 **Regulation of protein synthesis during nutrient limitation**

223 The downregulation of protein synthesis in *B. subtilis* cells experiencing nutrient limitation occurs  
224 as a result of ppGpp binding and thereby inhibiting IF2 (5). SasB is the main source of ppGpp and  
225 this work identifies how ppGpp synthesis by SasB and the subsequent downregulation of protein  
226 synthesis is coupled to changes in environmental conditions. First, SasB allosteric activation by  
227 the RelA product pppGpp is required for the downregulation of protein synthesis in a

228 subpopulation of cells (Figs 3, 5). RelA activity reflects tRNA charging levels (11), thereby  
229 coupling SasB-dependent regulation of protein synthesis to amino acid availability. Second, the  
230 SasA product pGpp inhibits the allosteric activation of SasB (Fig 4). Although SasA is  
231 constitutively active, *sasA* expression, at least in part, reflects availability of the Lipid II  
232 peptidoglycan precursor (20-22), thereby coupling SasB-dependent regulation of protein  
233 synthesis to cell wall metabolism. Thus, the roles of RelA and SasA in regulating SasB activation  
234 provides a mechanism to integrate multiple environmental signals in the decision to attenuate  
235 protein synthesis.

236

## 237 **Physiological sources of variability in SasB activity**

238 Phenotypic heterogeneity such as that observed here in the context of protein synthesis can arise  
239 from stochastic differences in gene expression (23). Although *sasB* expression exhibits  
240 substantial variability in expression cell to cell (Fig 2A), it does not correspond with the level of  
241 protein synthesis in individual cells (Fig 2C). Thus, variability of SasB activity in single cells is  
242 likely relevant. What could be responsible? Our observations link heterogeneity to the convergent  
243 regulation of SasB allosteric activation by the products of the RelA and SasA synthases, pppGpp  
244 and pGpp, respectively (Fig 4A). Thus, both enzymes are potential sources of variability and,  
245 consistently, strains carrying either *relA*<sup>Y308A</sup> or  $\Delta$ *sasA* mutations exhibit a loss in heterogeneity as  
246 compared to the wildtype (Figs 1C, 3C). Since RelA is a cellular sensor of tRNA charging, levels  
247 of which are highly sensitive to growth conditions (24), variations in this parameter could  
248 contribute to variability in protein synthesis via modulation of RelA activity. Noise in *sasA*  
249 transcription is dependent on the activity of PrkC, a membrane Ser/Thr kinase that regulates *sasA*  
250 via the essential WalRK two component system (20). Since both WalRK (25) and PrkC (26)  
251 activities reflect cell wall metabolism, variation in this process could also impact *sasA* variability.

252 Thus, differences in the protein synthesis activity of individual cells may reflect cellular variations  
253 in amino acid and cell wall metabolism.

254

## 255 **Allosteric activation of (pp)pGpp synthases**

256 Many genes encoding SAS proteins such as *sasB* are transcriptionally regulated (9). In addition,  
257 we observe here that allosteric activation of SasB by pppGpp (14) is required for the  
258 attenuation of protein synthesis (Fig 3) demonstrating *sasB* transcription is necessary but not  
259 sufficient, at least in the physiological context of nutrient limitation. We also find that this allosteric  
260 activation is antagonized by the SasA product pGpp (Fig 6A), consistent with the epistatic  
261 relationship between *sasB* and *sasA* (Fig 5A). Antagonistic regulatory mechanisms are likely  
262 widespread in this family of synthases. For example, the SasB homolog *Enterococcus faecalis*  
263 RelQ is attenuated by RNA that competes with pppGpp for binding to the allosteric site (27). Given  
264 the very recently observed allosteric activation of *B. subtilis* RelA by (p)ppGpp (28), an important  
265 question for future study is to determine whether this activation is also subject to antagonism by  
266 pGpp and, if so, to characterize the physiological consequences of this regulation.

267

## 268 **(pp)pGpp synthases**

269 The different protein synthesis activity of strains carrying a mutation in one of the genes encoding  
270 a (pp)pGpp synthase (Figs 1, 3C) is consistent with previous reports that SAS enzymes differ  
271 between themselves and also with RelA in the guanosine nucleotide that they preferentially  
272 produce (18, 29-31). Our observations demonstrate that each particular product differs in its *in*  
273 *vivo* function, thereby extending previous observations that ppGpp and pppGpp can differ in their  
274 effect on gene transcription in *E. coli* (32). The biochemical experiments demonstrating that pGpp  
275 antagonizes pppGpp allosteric activation of SasB, but itself is not capable of activation (Fig 4A;  
276 S4) are consistent with our physiological experiments. The biochemical activity of these

277 nucleotides have been reported to differ, including observations that pppGpp is much more potent  
278 than ppGpp in stimulating SasB (14), that pGpp is a significantly more potent inhibitor of purine  
279 salvage enzyme XPRT than ppGpp (33), and that ppGpp, but not pppGpp, inhibits the function of  
280 IF2 in stimulating subunit joining (34). Thus, these three closely related nucleotides have distinct  
281 biochemical and, as we show here, physiological activities.

282

## 283 **Physiological implications of heterogeneity in protein** 284 **synthesis**

285 (p)ppGpp has long been thought to mediate entry into bacterial quiescence (35, 36). This  
286 transition facilitates survival in nutrient limited environments and its regulation depends upon the  
287 integration of a multitude of rapidly changing environmental signals that themselves may impair  
288 decision-making. One way bacteria deal with such uncertainty is to generate subpopulations, with  
289 distinct, often bimodal phenotypes from a population of genetically identical cells (23). Examples  
290 of phenotypic variation in *B. subtilis* include heterogeneity in specific metabolic activities such as  
291 acetate production (37) or in developmental transitions such as sporulation (38) and competence  
292 (39). The phenotypic variation in protein synthesis activity we observe here has potentially broad  
293 functional implications given its central role in cellular physiology. A global reduction in protein  
294 synthesis activity, if accompanied by a constant rate of protein degradation, would have the effect  
295 of reducing overall metabolic capacity, especially by affecting processes like ribosome assembly.  
296 Global effects also could have specific regulatory consequences. For example, the alternative  
297 sigma factor *B. subtilis* SigD drives expression of genes controlling daughter cell separation and  
298 motility that exhibit well characterized phenotypic variation. RelA affects both this variability as  
299 well as absolute levels of SigD (40), suggesting that differences in protein synthesis between cells  
300 contribute to SigD variability.

301

302 In summary, this work demonstrates that three differentially phosphorylated nucleotides and their  
303 respective synthases comprise a signaling network responsible for the heterogenous regulation  
304 of protein synthesis as *B. subtilis* cultures enter quiescence. We find that this heterogeneity is  
305 dependent on the RelA product pppGpp, which allosterically activates SasB, and the SasA  
306 product pGpp, which antagonizes this activation. Since the synthesis of pppGpp and pGpp  
307 reflects amino acid and peptidoglycan precursor availability, respectively, these parameters are  
308 thereby coupled to protein synthesis activity and facilitate cell decision making during the entry  
309 into quiescence.

310

## 311 **Materials and Methods**

### 312 **Strains and media.**

313 Strains were derived from *B. subtilis* 168 *trpC2. sasA* (*ywaC*) and *sasB* (*yjbM*) gene knockouts  
314 were from transformed into *B. subtilis* 168 *trpC2* using genomic DNA from BD5467 (41). The *sasB*  
315 transcriptional reporter strain was constructed similarly as described (20). Briefly, a 107 bp region  
316 encompassing the *sasB* operon promoter ( $P_{sasB}$ ) was amplified and inserted into AEC 127 using  
317 *EcoRI* and *BamHI* sites. The resulting AEC 127  $P_{sasB}$  was integrated into *B. subtilis* 168 *trpC2* at  
318 *sacA*. *sasB*<sup>F42A</sup> and *relA*<sup>Y308A</sup> strains were generated using integration of pMINIMAD2 derivatives  
319 (pMINIMAD2 *sasB*<sup>F42A</sup> and pMINIMAD2 *relA*<sup>Y308A</sup>, respectively). Briefly, *sasB* was amplified  
320 excluding start and stop codons and F42A mutation was introduced using overlap extension PCR.  
321 *sasB*<sup>F42A</sup> was inserted into pMINIMAD2 vector using *EcoRI* and *SalI* sites. pMINIMAD2 *sasB*<sup>F42A</sup>  
322 vector was transformed into *B. subtilis* 168 *trpC2* using a standard transformation protocol.  
323 Transformants were selected for erythromycin resistance at 45 °C overnight and grown for 8 hours  
324 at RT in LB. Cultures were diluted 1:10 in LB and grown overnight. Cultures were plated for single  
325 colonies and grown overnight at 45 °C. Single colonies were checked for erythromycin sensitivity

326 and sensitive clones were checked for *sasB*<sup>F42A</sup> allele by Sanger sequencing of *sasB* amplified  
327 genomic region. The *relA*<sup>Y308A</sup> strain was generated in a similar way but *EcoRI* and *BamHI* sites  
328 were used to insert the *relA*<sup>Y308A</sup> gene into pMINIMAD2.

329

## 330 **Growth curves**

331 Growth curves were performed in a Tecan Infinite m200 plate reader at 37 °C with continuous  
332 shaking and OD<sub>600</sub> measurements were made every five min. Cultures were grown from single  
333 colonies from fresh LB plates grown overnight at 37 °C. Exponential phase starter cultures (OD<sub>600</sub>  
334 ~ 0.5 - 1.5) were diluted to OD<sub>600</sub> = 0.01 and grown in 96-well Nunclon Delta surface clear plates  
335 (Thermo Scientific) with 150 µL per well. All growth curves were done in triplicate and media-only  
336 wells were used to subtract background absorbance.

337

## 338 **OPP labeling**

339 OPP labeling of cells was as described (5). Exposure times were 30 msec for phase contrast, and  
340 20 msec for mCherry. Fluorescence intensity of ~1570 single cells per experiment was  
341 determined using ImageJ. Cells were binned based on fluorescence intensity using 50 a.u. wide  
342 bins in all experiments and number of cells in each bin presented as a histogram.

343

## 344 **Protein expression and purification**

345 Wildtype and F42A SasB proteins were expressed and purified essentially as described (14).  
346 Wildtype *sasB* was amplified from *B. subtilis* 168 *trpC2*. The F42A mutation was introduced using  
347 overlap extension PCR. WT and *sasB*<sup>F42A</sup> PCR products were inserted into pETPHOS expression  
348 vector using *EcoRI* and *BamHI* sites. pETPHOS WT *sasB* and pETPHOS *sasB*<sup>F42A</sup> were  
349 transformed into *E.coli* BL21 and proteins were induced with 1 mM IPTG for 2h at OD<sub>600</sub> ~0.5.

350 Cells were harvested at 4 °C and lysed using a Fastprep (MP biomedical) in 50 mM Tris (pH  
351 8.0), 250 mM NaCl, 5 mM MgCl<sub>2</sub>, 2 mM BME, 0.2 mM PMSF, and 10mM imidazole. Lysates were  
352 clarified and bound to a Ni-NTA column (Qiagen) for 1h. Columns were washed using 20 mM  
353 imidazole. Protein was eluted using 500 mM imidazole, dialyzed into 20mM Tris, 500 mM NaCl,  
354 5mM MgCl<sub>2</sub>, 2 mM BME, and 10% glycerol and stored at -20 °C. NahA protein was purified in a  
355 similar way except that NahA was induced for 1h at 30 °C and NahA expressing cells (JDE3138)  
356 were lysed, washed, and eluted in 250 mM NaCl instead of 500 mM.

357

## 358 **pGpp synthesis**

359 pGpp was synthesized *in vitro* by purified NahA enzyme as described (18). Briefly, 10 nM purified  
360 *B. subtilis* NahA was incubated with 30 nM pppGpp (Trilink Biotechnologies) in 40 mM Tris-HCl  
361 (pH 7.5), 100 mM NaCl, 10 mM MgCl<sub>2</sub> at 37 °C for 1 hour. Reactions were monitored for  
362 conversion of pppGpp to pGpp using thin layer chromatography on PEI-cellulose plates in 1.5 M  
363 KH<sub>2</sub>PO (pH 3.6). Nucleotides were visualized using short wave UV light. NahA enzyme was  
364 precipitated using ice cold acetone and nucleotides were stored at -20 °C.

365

## 366 **SasB activity assays and TLC**

367 SasB activity was assayed by measuring the amount of ppGpp generated similar to (5). Briefly,  
368 0.8 μM purified *B. subtilis* WT or F42A SasB was incubated with 0.5 μCi of [ $\gamma$ -<sup>32</sup>P]-ATP  
369 (PerkinElmer) and 50 μM GDP in 20 mM Tris (pH 7.5), 500 mM NaCl, 5 mM MgCl<sub>2</sub>, 2mM BME.  
370 SasB was allosterically activated using 12.5 μM pppGpp (Trilink Biotechnologies) and pGpp was  
371 added as noted. Reactions were performed in a total volume of 10 μL, and each reaction was  
372 incubated at 37 °C for 1 min before being stopped using 5 μL of ice cold acetone. Conversion of  
373 ATP to ppGpp was visualized using thin layer chromatography on PEI-cellulose plates in 1.5 M



374 KH<sub>2</sub>PO<sub>4</sub> (pH 3.6). Plates were dried completely at RT and exposed for 5 min on a phosphor  
375 storage screen and visualized (GE Typhoon). ATP and ppGpp spot intensities were quantified  
376 using ImageJ.

377

## 378 **Acknowledgements**

379 SD was supported in part by the Columbia University Graduate Training Program in Microbiology,  
380 Immunology and Infection (R01 AI106711, Program Directors D. Fidock and L. Symington). JD  
381 was supported by NIH R01GM141953, R35GM141953, R21AI156397, and is a Burroughs-  
382 Wellcome Investigator in the Pathogenesis of Infectious Disease.

383

384

## 385 **References**

- 386
- 387 1. Gaca AO, Colomer-Winter C, Lemos JA. Many means to a common end: the intricacies of  
388 (p)ppGpp metabolism and its control of bacterial homeostasis. *J Bacteriol.* 2015;197(7):1146-56.
  - 389 2. Steinchen W, Bange G. The magic dance of the alarmones (p)ppGpp. *Mol Microbiol.*  
390 2016;101(4):531-44.
  - 391 3. Artsimovitch I, Patlan V, Sekine S, Vassilyeva MN, Hosaka T, Ochi K, et al. Structural Basis for  
392 Transcription Regulation by Alarmone ppGpp. *Cell.* 2004;117:299-310.
  - 393 4. Ross W, Sanchez-Vazquez P, Chen AY, Lee JH, Burgos HL, Gourse RL. ppGpp Binding to a  
394 Site at the RNAP-DksA Interface Accounts for Its Dramatic Effects on Transcription Initiation  
395 during the Stringent Response. *Mol Cell.* 2016;62(6):811-23.
  - 396 5. Diez S, Ryu J, Caban K, Gonzalez RL, Jr., Dworkin J. The alarmones (p)ppGpp directly regulate  
397 translation initiation during entry into quiescence. *Proc Natl Acad Sci U S A.* 2020;117(27):15565-  
398 72.
  - 399 6. Kriel A, Bittner AN, Kim SH, Liu K, Tehranchi AK, Zou WY, et al. Direct regulation of GTP  
400 homeostasis by (p)ppGpp: a critical component of viability and stress resistance. *Mol Cell.*  
401 2012;48(2):231-41.
  - 402 7. Wang JD, Sanders GM, Grossman AD. Nutritional control of elongation of DNA replication by  
403 (p)ppGpp. *Cell.* 2007;128(5):865-75.
  - 404 8. Corrigan RM, Bellows LE, Wood A, Grundling A. ppGpp negatively impacts ribosome assembly  
405 affecting growth and antimicrobial tolerance in Gram-positive bacteria. *Proc Natl Acad Sci U S*  
406 *A.* 2016;113(12):E1710-9.
  - 407 9. Irving SE, Corrigan RM. Triggering the stringent response: signals responsible for activating  
408 (p)ppGpp synthesis in bacteria. *Microbiology.* 2018;164(3):268-76.
  - 409 10. Steinchen W, Vogt MS, Altegoer F, Giammarinaro PI, Horvatek P, Wolz C, et al. Structural and  
410 mechanistic divergence of the small (p)ppGpp synthetases RelP and RelQ. *Sci Rep.*  
411 2018;8(1):2195.
  - 412 11. Wendrich TM, Marahiel MA. Cloning and characterization of a relA/spoT homologue from  
413 *Bacillus subtilis* *Molecular Microbiology.* 1997;26(1):65-79.

- 414 12. Tagami K, Nanamiya H, Kazo Y, Maehashi M, Suzuki S, Namba E, et al. Expression of a small  
415 (p)ppGpp synthetase, YwaC, in the (p)ppGpp(0) mutant of *Bacillus subtilis* triggers YvyD-  
416 dependent dimerization of ribosome. *Microbiologyopen*. 2012;1(2):115-34.
- 417 13. Nanamiya H, Kasai K, Nozawa A, Yun CS, Narisawa T, Murakami K, et al. Identification and  
418 functional analysis of novel (p)ppGpp synthetase genes in *Bacillus subtilis*. *Mol Microbiol*.  
419 2008;67(2):291-304.
- 420 14. Steinchen W, Schuhmacher JS, Altegoer F, Fage CD, Srinivasan V, Linne U, et al. Catalytic  
421 mechanism and allosteric regulation of an oligomeric (p)ppGpp synthetase by an alarmone. *Proc*  
422 *Natl Acad Sci U S A*. 2015;112(43):13348-53.
- 423 15. Hogg T, Mechold U, Malke H, Cashel M, Hilgenfeld R. Conformational antagonism between  
424 opposing active sites in a bifunctional RelA/SpoT homolog modulates (p)ppGpp metabolism  
425 during the stringent response. *Cell*. 2004;117:57-68.
- 426 16. Manav MC, Beljantseva J, Bojer MS, Tenson T, Ingmer H, Haurlyuk V, et al. Structural basis for  
427 (p)ppGpp synthesis by the *Staphylococcus aureus* small alarmone synthetase RelP. *J Biol*  
428 *Chem*. 2018;293(9):3254-64.
- 429 17. Srivatsan A, Han Y, Peng J, Tehranchi AK, Gibbs R, Wang JD, et al. High-precision, whole-  
430 genome sequencing of laboratory strains facilitates genetic studies. *PLoS Genet*.  
431 2008;4(8):e1000139.
- 432 18. Yang J, Anderson BW, Turdiev A, Turdiev H, Stevenson DM, Amador-Noguez D, et al. The  
433 nucleotide pGpp acts as a third alarmone in *Bacillus*, with functions distinct from those of (p)  
434 ppGpp. *Nat Commun*. 2020;11(1):5388.
- 435 19. Petchiappan A, Naik SY, Chatterji D. RelZ-Mediated Stress Response in *Mycobacterium*  
436 *smegmatis*: pGpp Synthesis and Its Regulation. *J Bacteriol*. 2020;202(2).
- 437 20. Libby EA, Reuveni S, Dworkin J. Multisite phosphorylation drives phenotypic variation in  
438 (p)ppGpp synthetase-dependent antibiotic tolerance. *Nat Commun*. 2019;10(1):5133.
- 439 21. Cao M, Wang T, Ye R, Helmann JD. Antibiotics that inhibit cell wall biosynthesis induce  
440 expression of the *Bacillus subtilis* sigma(W) and sigma(M) regulons. *Mol Microbiol*.  
441 2002;45(5):1267-76.
- 442 22. Czarny TL, Perri AL, French S, Brown ED. Discovery of novel cell wall-active compounds using  
443 P ywaC, a sensitive reporter of cell wall stress, in the model gram-positive bacterium *Bacillus*  
444 *subtilis*. *Antimicrob Agents Chemother*. 2014;58(6):3261-9.
- 445 23. Ackermann M. A functional perspective on phenotypic heterogeneity in microorganisms. *Nat Rev*  
446 *Microbiol*. 2015;13(8):497-508.
- 447 24. Parker DJ, Lalanne JB, Kimura S, Johnson GE, Waldor MK, Li GW. Growth-Optimized  
448 Aminoacyl-tRNA Synthetase Levels Prevent Maximal tRNA Charging. *Cell Syst*. 2020;11(2):121-  
449 30 e6.
- 450 25. Dubrac S, Bisicchia P, Devine KM, Msadek T. A matter of life and death: cell wall homeostasis  
451 and the WalkR (YycGF) essential signal transduction pathway. *Mol Microbiol*. 2008;70(6):1307-  
452 22.
- 453 26. Kaur P, Rausch M, Malakar B, Watson U, Damle NP, Chawla Y, et al. LipidIII interaction with  
454 specific residues of *Mycobacterium tuberculosis* PknB extracytoplasmic domain governs its  
455 optimal activation. *Nat Commun*. 2019;10(1):1231.
- 456 27. Beljantseva J, Kudrin P, Andresen L, Shingler V, Atkinson GC, Tenson T, et al. Negative  
457 allosteric regulation of *Enterococcus faecalis* small alarmone synthetase RelQ by single-  
458 stranded RNA. *Proc Natl Acad Sci U S A*. 2017;114(14):3726-31.
- 459 28. Takada H, Rogharian M, Caballero-Montes J, Van Nerom K, Jimmy S, Kudrin P, et al. Ribosome  
460 association primes the stringent factor Rel for tRNA-dependent locking in the A-site and  
461 activation of (p)ppGpp synthesis. *Nucleic Acids Res*. 2021;49(1):444-57.
- 462 29. Gaca AO, Kudrin P, Colomer-Winter C, Beljantseva J, Liu K, Anderson B, et al. From (p)ppGpp  
463 to (pp)pGpp: Characterization of Regulatory Effects of pGpp Synthesized by the Small Alarmone  
464 Synthetase of *Enterococcus faecalis*. *J Bacteriol*. 2015;197(18):2908-19.

- 465 30. Yang N, Xie S, Tang NY, Choi MY, Wang Y, Watt RM. The Ps and Qs of alarmone synthesis in  
466 *Staphylococcus aureus*. PLoS One. 2019;14(10):e0213630.
- 467 31. Horvatek P, Salzer A, Hanna AMF, Gratani FL, Keinhorster D, Korn N, et al. Inducible expression  
468 of (pp)pGpp synthetases in *Staphylococcus aureus* is associated with activation of stress  
469 response genes. PLoS Genet. 2020;16(12):e1009282.
- 470 32. Mechold U, Potrykus K, Murphy H, Murakami KS, Cashel M. Differential regulation by ppGpp  
471 versus pppGpp in *Escherichia coli*. Nucleic Acids Res. 2013;41(12):6175-89.
- 472 33. Anderson BW, Hao A, Satyshur KA, Keck JL, Wang JD. Molecular Mechanism of Regulation of  
473 the Purine Salvage Enzyme XPRT by the Alarmones pppGpp, ppGpp, and pGpp. J Mol Biol.  
474 2020;432(14):4108-26.
- 475 34. Vinogradova DS, Zegarra V, Maksimova E, Nakamoto JA, Kasatsky P, Paleskava A, et al. How  
476 the initiating ribosome copes with ppGpp to translate mRNAs. PLoS Biol. 2020;18(1):e3000593.
- 477 35. Rittershaus ES, Baek SH, Sasseti CM. The normalcy of dormancy: common themes in microbial  
478 quiescence. Cell Host Microbe. 2013;13(6):643-51.
- 479 36. Bergkessel M, Basta DW, Newman DK. The physiology of growth arrest: uniting molecular and  
480 environmental microbiology. Nat Rev Microbiol. 2016;14(9):549-62.
- 481 37. Rosenthal AZ, Qi Y, Hormoz S, Park J, Li SH, Elowitz MB. Metabolic interactions between  
482 dynamic bacterial subpopulations. Elife. 2018;7.
- 483 38. Veening JW, Stewart EJ, Berngruber TW, Taddei F, Kuipers OP, Hamoen LW. Bet-hedging and  
484 epigenetic inheritance in bacterial cell development. Proc Natl Acad Sci U S A.  
485 2008;105(11):4393-8.
- 486 39. Maamar H, Raj A, Dubnau D. Noise in gene expression determines cell fate in *Bacillus subtilis*.  
487 Science. 2007;317(5837):526-9.
- 488 40. Ababneh QO, Herman JK. RelA inhibits *Bacillus subtilis* motility and chaining. J Bacteriol.  
489 2015;197(1):128-37.
- 490 41. Mirouze N, Desai Y, Raj A, Dubnau D. Spo0A~P imposes a temporal gate for the bimodal  
491 expression of competence in *Bacillus subtilis*. PLoS Genet. 2012;8(3):e1002586.

492

## 493 Supporting information

494 **S1 Fig. Late transition phase time point and determination of “OFF” cells. (A)**  
495 Growth curve of wildtype *B. subtilis* showing point (OD<sub>600</sub> ~0.685) where cells were  
496 labeled with OPP (dashed line). **(B)** Representative distribution of OPP labeled wildtype  
497 *B. subtilis*. Gray box shows cutoff for cells with low rates of protein synthesis (“OFF”).  
498 Threshold was determined as the value (850 a.u.) that is higher than >95% of cells of  
499 wildtype *B. subtilis* that was labeled with OPP in stationary phase across three  
500 independent experiments.

501

502 **S2 Fig. Quantitation of “OFF” cells and statistical analysis for Fig 1.** Cells were  
503 designated as “OFF” using threshold in Fig S1. % “OFF” in a population was quantified  
504 in three separate experiments containing a total of > 1300 cells (means ± SDs). \*p < 0.05,

505

506 **S3 Fig. Quantitation of “OFF” cells and statistical analysis for Fig 3.** Cells were  
507 designated as “OFF” using threshold in Fig S1. % of population “OFF” was quantified in  
508 three separate experiments containing a total of >1300 cells (means ± SDs). \*p < 0.05,  
509 \*\*p < 0.01.

510

511 **S4 Fig. pGpp does not inhibit SasB basal activity. (Top)** representative TLC analysis  
512 of wildtype SasB activity in the absence of allosteric activation (no ppGpp added) and  
513 with increasing concentrations of pGpp (uM). **(Bottom)** ratio of ppGpp calculated using the  
514 formula,  $\text{ppGpp}/\text{ATP} + \text{ppGpp}$ . Statistical analysis (t-test) showed no significance ( $p > 0.05$ )  
515 between any reaction containing SasB whether or not pGpp was included. Statistical  
516 analysis was performed on three separate experiments (means  $\pm$  SDs).  
517

518 **S5 Fig. Quantitation of “OFF” cells and statistical analysis for Fig 5.** Cells were  
519 designated as “OFF” using cutoff in Fig S1. % of population “OFF” was quantified in three  
520 separate experiments containing a total of >1300 cells (means  $\pm$  SDs). \* $p < 0.05$   
521

522 **S6 Fig. Effect of *nahA* on heterogeneity. (A, B)** Representative picture and population  
523 distribution of OPP labeled **(A)** wildtype (JDB1772), **(B)**  $\Delta nahA$  (JDB4095) strains during late  
524 transition phase.  
525

526 **S1 Table. Plasmids used in this study**

527 **S2 Table. Strains used in this study**

528 **S3 Table. Oligonucleotides used in this study**

529

# Figure 1

A

Wildtype

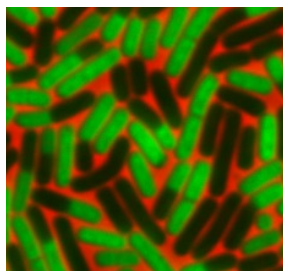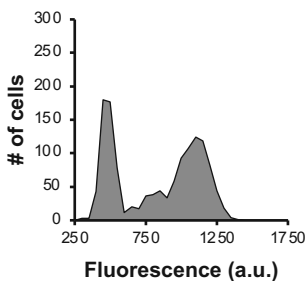

B

$\Delta sasB$

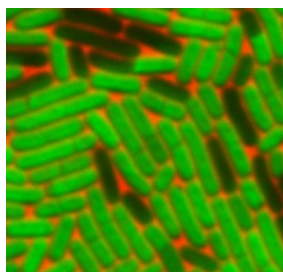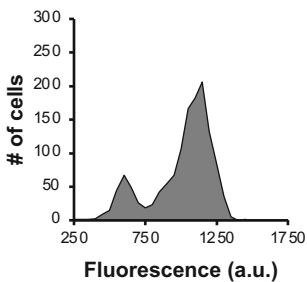

C

$\Delta sasA$

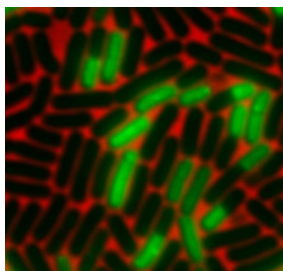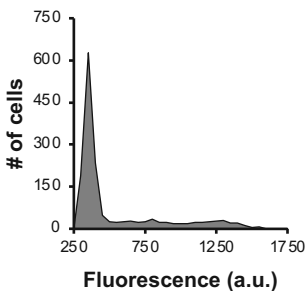

# Figure 2

## A

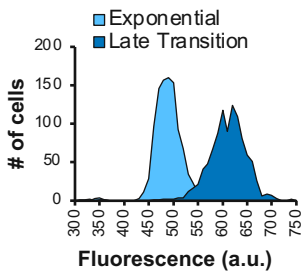

## B

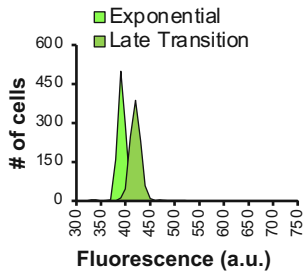

## C

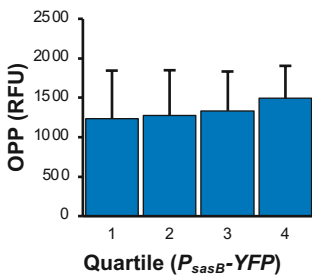

## D

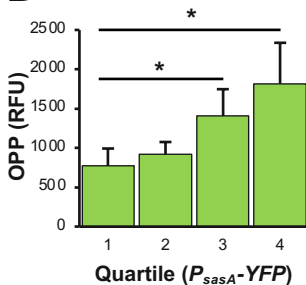

# Figure 3

A

Wildtype

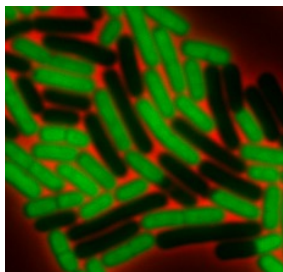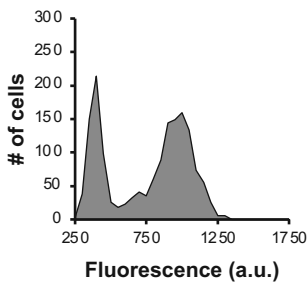

B

*sasB*<sup>F42A</sup>

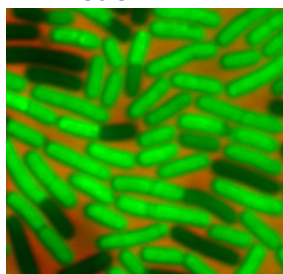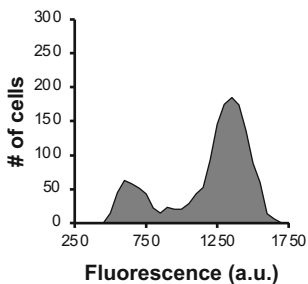

C

*relA*<sup>Y308A</sup>

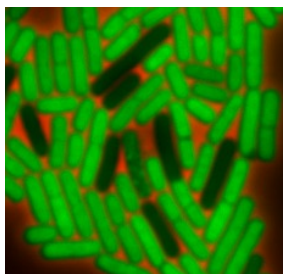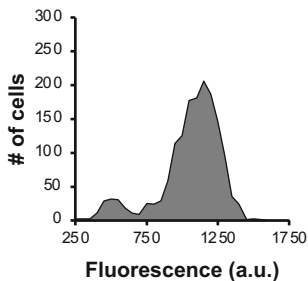

# Figure 4

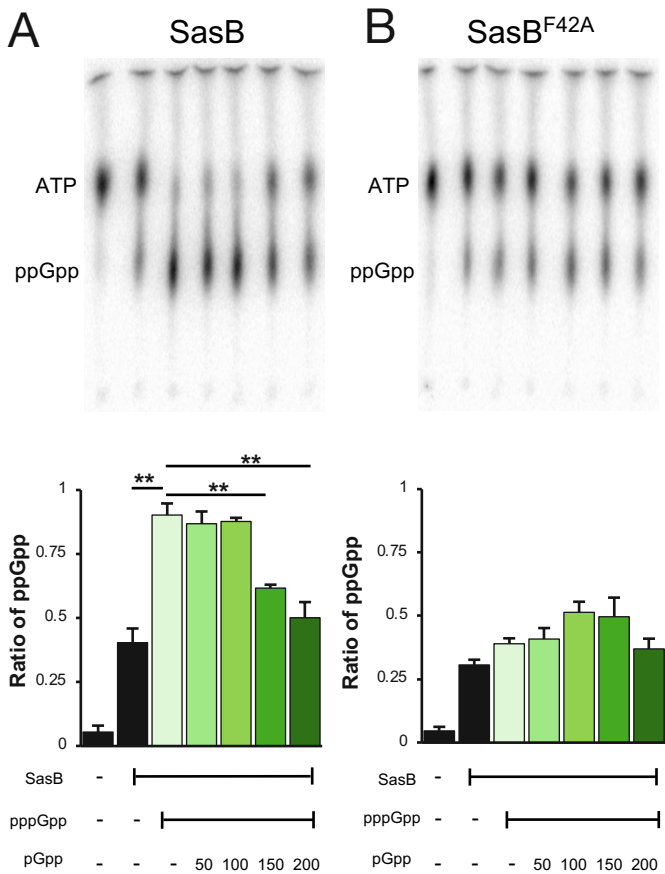



# Figure 5

A

$\Delta sasA$

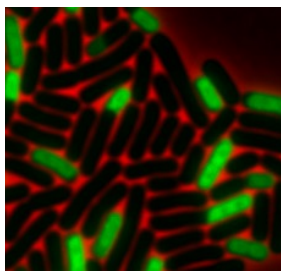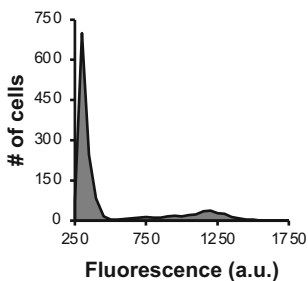

B

$\Delta sasA \Delta sasB$

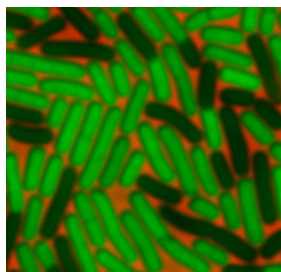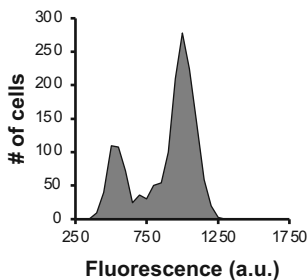

C

$\Delta sasA relA^{Y308A}$

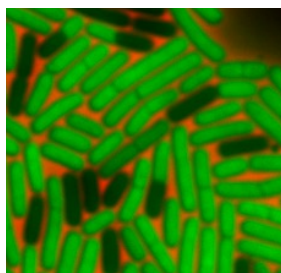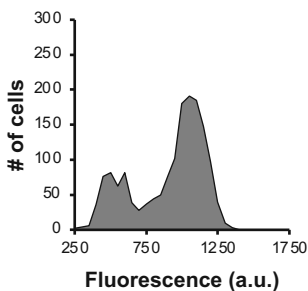

# Figure 6

A

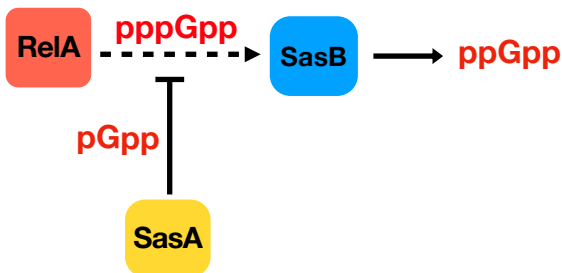

B

High  
protein  
synthesis

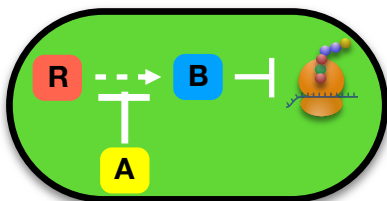

Low  
protein  
synthesis

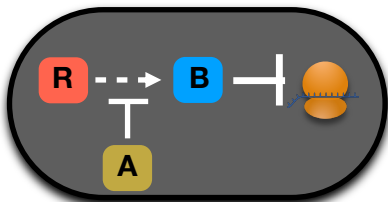

# S1 Fig

## S1A

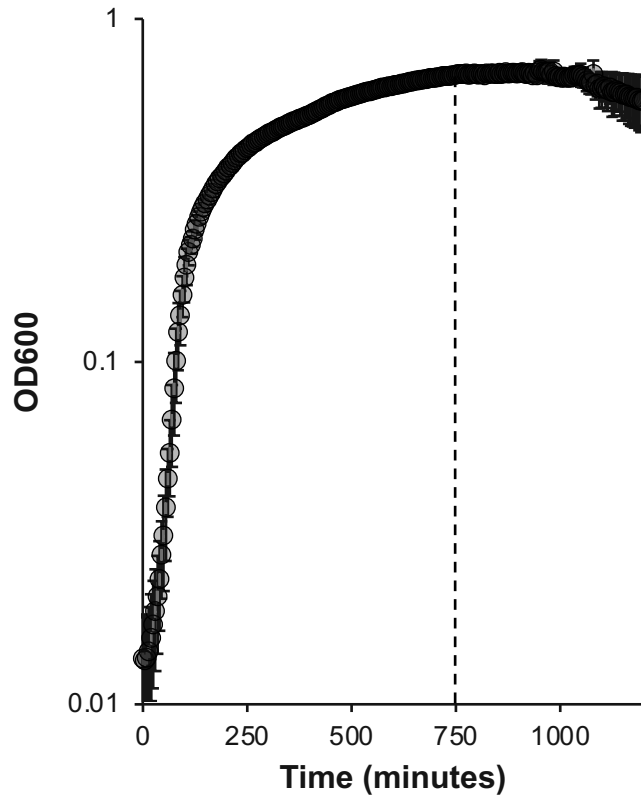

## S1B

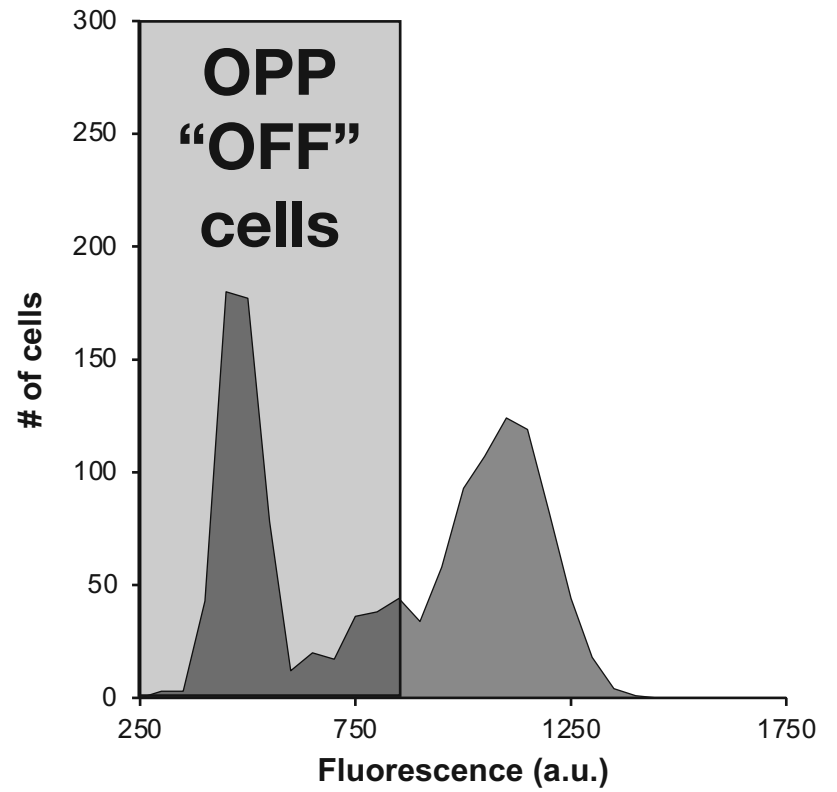

# S2 Fig

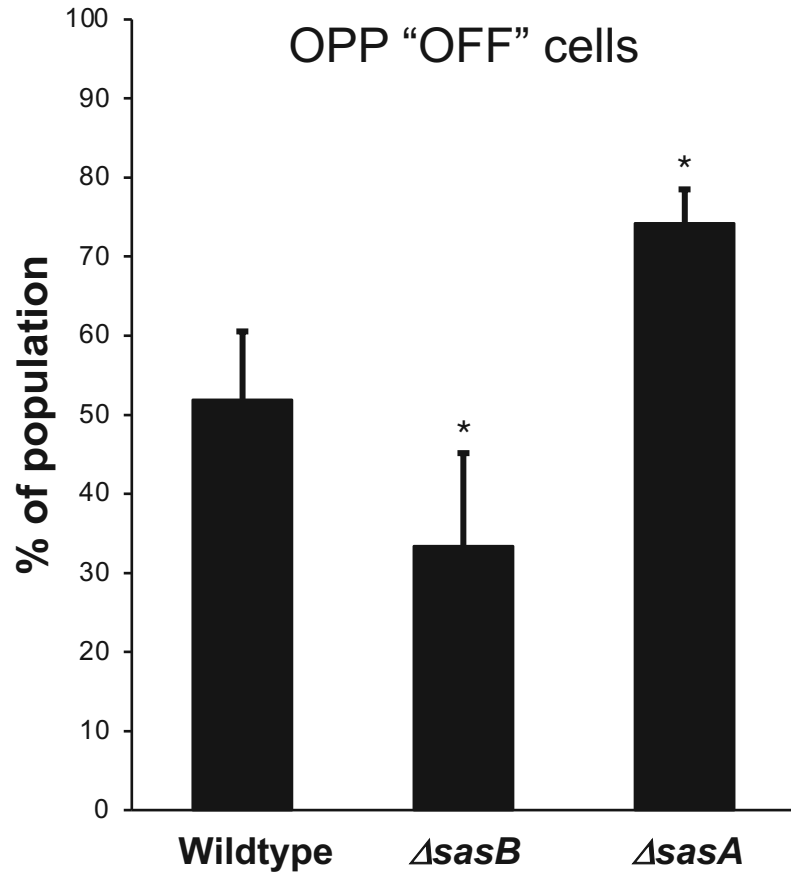

# S3 Fig

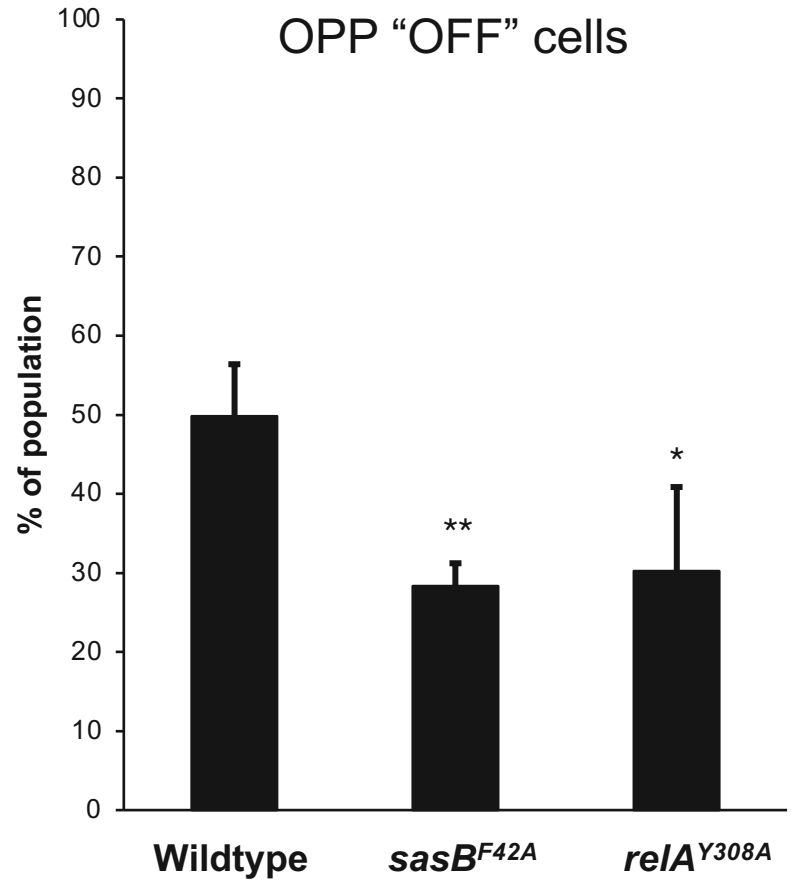

# S4 Fig

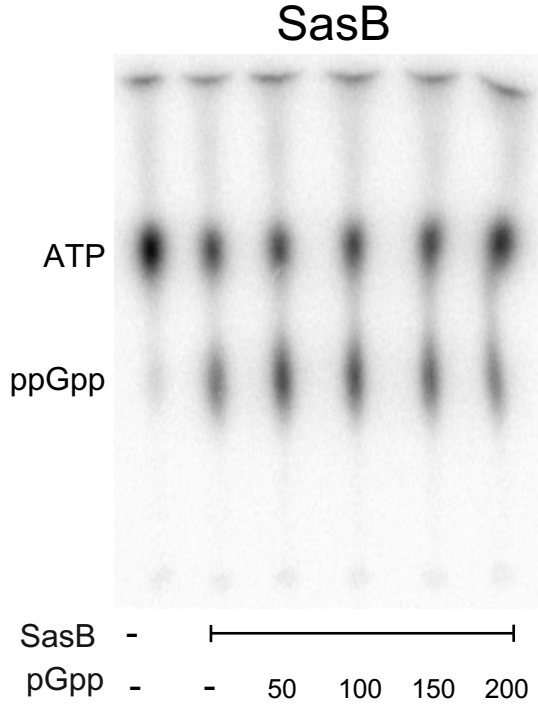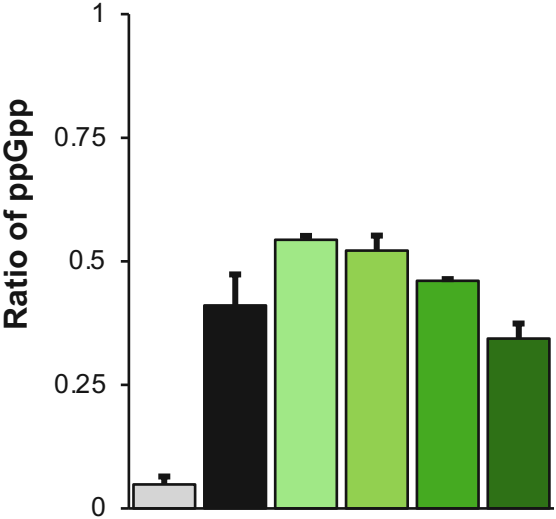

# S5 Fig

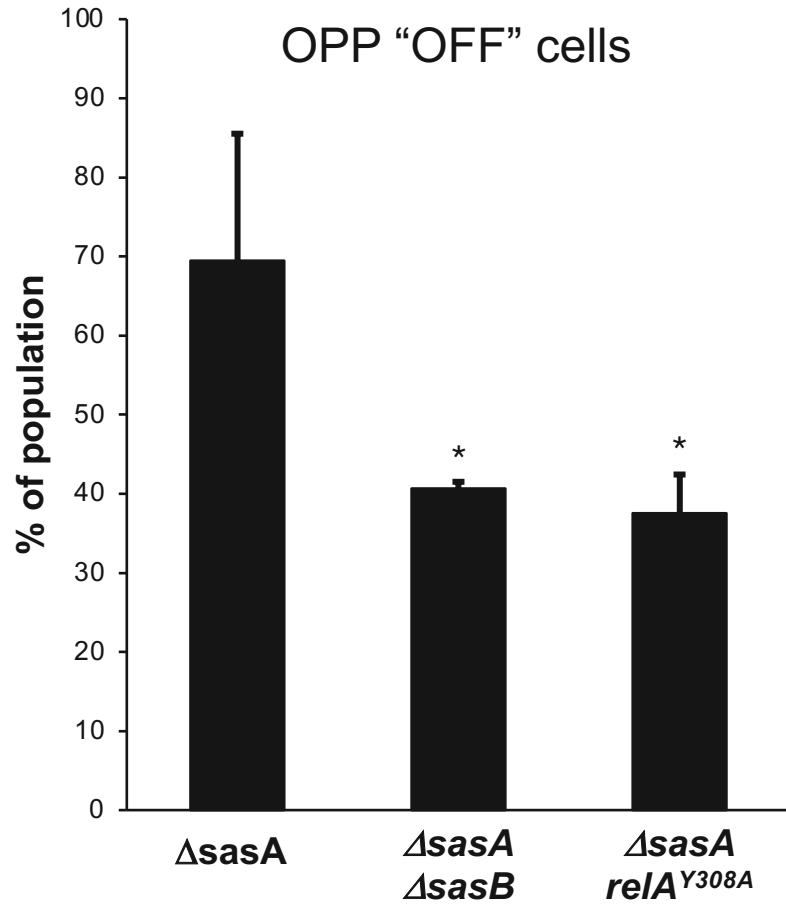

# S6 Fig

## S6A

Wildtype

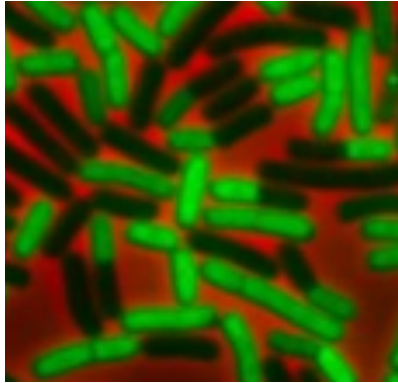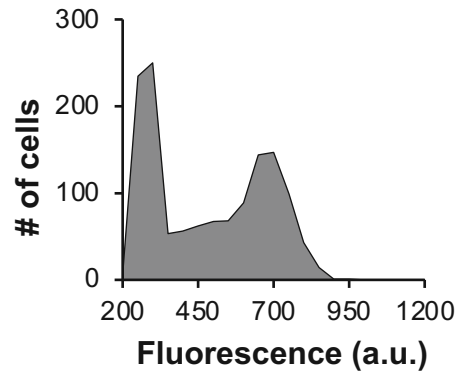

## S6B

$\Delta nahA$

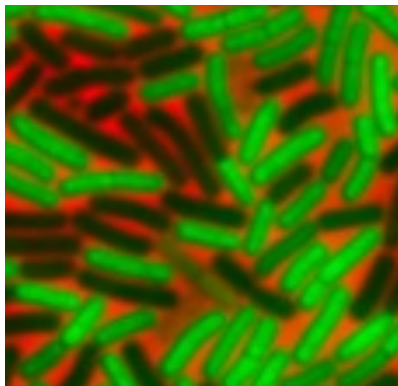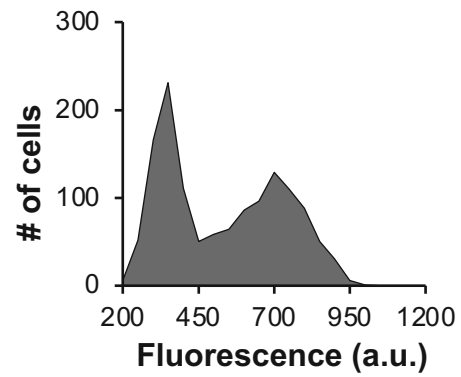



**S1 Table. Plasmids used in this study**

|                                        |            |  |
|----------------------------------------|------------|--|
| pETPHOS                                | Lab stock  |  |
| pMINIMAD2                              | (6)        |  |
| AEC 127                                | (2)        |  |
| pETPHOS WT <i>sasB</i>                 | This study |  |
| pETPHOS <i>sasB</i> <sup>F42A</sup>    | This study |  |
| pETPHOS <i>yvcI</i>                    | This study |  |
| pMINIMAD2 <i>relA</i> <sup>Y308A</sup> | This study |  |
| pMINIMAD2 <i>sasB</i> <sup>F42A</sup>  | This study |  |
| AEC 127 <i>PsasB</i>                   | This study |  |

**S2 Table. Strains used in this study**

|                                                                     |            |          |
|---------------------------------------------------------------------|------------|----------|
| 168 <i>trpC2</i> (WT)                                               | Lab stock  | JDB 1772 |
| <i>trpC2</i> $\Delta$ <i>sasA::kan</i>                              | (1)        | JDB 4310 |
| <i>trpC2</i> $\Delta$ <i>sasB::tet</i>                              | (1)        | JDB 4311 |
| <i>sacA::P<sub>sasB</sub>-YFP (cm)</i>                              | This study | JDB 4341 |
| <i>sacA::P<sub>sasA</sub>-YFP (cm)</i>                              | (2)        | JDB 4030 |
| <i>trpC2 sasB<sup>F42A</sup></i>                                    | This study | JDB 4340 |
| <i>trpC2 relA<sup>Y308A</sup></i>                                   | This study | JDB 4300 |
| <i>trpC2</i> $\Delta$ <i>sasA::kan</i><br>$\Delta$ <i>sasB::tet</i> | (1)        | JDB 4312 |
| <i>trpC2</i> $\Delta$ <i>sasA::kan relA<sup>Y308A</sup></i>         | This study | JDB 4301 |
| 168 <i>trpC2</i> $\Delta$ <i>prpC</i>                               | (7)        | JDB 1773 |
| 168 <i>trpC2</i> $\Delta$ <i>prkC</i>                               | (7)        | JDB 1774 |
| <i>DH5<math>\alpha</math></i> pMINIMAD2 <i>relA<sup>Y308A</sup></i> | This study | JDE 3115 |
| <i>DH5<math>\alpha</math></i> pMINIMAD2 <i>sasB<sup>F42A</sup></i>  | This study | JDE 3135 |
| <i>DH5<math>\alpha</math></i> AEC 127 <i>P<sub>sasB</sub></i>       | This study |          |
| <i>BL21</i> pETPHOS WT <i>sasB</i>                                  | This study | JDE 3136 |
| <i>BL21</i> pETPHOS <i>sasB<sup>F42A</sup></i>                      | This study | JDE 3137 |
| <i>BL21</i> pETPHOS <i>yvcl</i>                                     | This study | JDE 3138 |

**S3 Table Oligonucleotides used in this study**

|                                 |            |                                 |
|---------------------------------|------------|---------------------------------|
| GGCTAGAATTCTGATGCTCTTCCTTTCCG   | This study | yjbM operon promoter<br>EcoRI F |
| GGCTAGGATCCACAAAGTACAGATTCATTTT | This study | yjbM operon promoter<br>BamHI R |
| GGGCCCCGAATTCGATGACAAACAATGGGAG | This study | F42A yjbM EcoRI F<br>pMINIMAD2  |
| GGGCCCCGTGCGACTTGTTGCTCGCTTCCT  | This study | F42A yjbM Sall R<br>pMINIMAD2   |
| TTCACCGATCGAAGCTGTGACCGGACGCG   | This study | yjbM F42A F                     |
| CGCGTCCGGTCACAGCTTCGATCGGTGAA   | This study | yjbM F42A R                     |
| CATCTTTCGTTTTTTTTCTTG           | This study | Y308A relA EcoRI F<br>pMINIMAD2 |
| TGGGCTTCATTCGTTTTG              | This study | Y308A relA BamHI R<br>pMINIMAD2 |
| AGCCGAATATGGCTCAATCGCTTCA       | This study | Y308A relA F                    |
| TGAAGCGATTGAGCCATATTCGGCT       | This study | Y308A relA R                    |
| CCGGGCATATGGATGACAAACAATGG      | This study | yjbM NdeI F                     |
| GGGAAAAGTAGTCTATTGTTGCTCGCTTCC  | This study | yjbM SpeI R                     |
| GGGCCCCATATGGTGACGTAATTGCAAAGA  | This study | yvcl NdeI F                     |
| GGGCCCACTAGTCTATTTGATGTGCTGCGG  | This study | yvcl SpeI R                     |
